# Supplementary material
Source: PubMed Central journal article supplement (PMC4546864)
Supplement: NIHMS702218-supplement-02.pdf [file NIHMS702218-supplement-02.pdf]

## Supplementary data

### Appendix 1. Survey for Relatives and Patients Regarding Causes of Schizophrenia

¿Cuál en su opinión es la causa de la Esquizofrenia? (*What in your opinion is the cause of schizophrenia?*)

|    | <b>Causa</b><br>( <i>Cause</i> )                                             | <b>Posible Causa</b><br>( <i>Possible Cause</i> ) | <b>No es una causa</b><br>( <i>It is not a Cause</i> ) |
|----|------------------------------------------------------------------------------|---------------------------------------------------|--------------------------------------------------------|
| 1  | Trastorno cerebral<br>( <i>Brain disorder</i> )                              |                                                   |                                                        |
| 2  | Estrés relacionado con la familia<br>( <i>Family-related stress</i> )        |                                                   |                                                        |
| 3  | Problemas de personalidad<br>( <i>Personality problems</i> )                 |                                                   |                                                        |
| 4  | Herencia<br>( <i>Heredity</i> )                                              |                                                   |                                                        |
| 5  | Enfermedad física<br>( <i>Physical illness</i> )                             |                                                   |                                                        |
| 6  | Estrés laboral<br>( <i>Work-related stress</i> )                             |                                                   |                                                        |
| 7  | Problemas económicos<br>( <i>Economic problems</i> )                         |                                                   |                                                        |
| 8  | Fatiga<br>( <i>Fatigue</i> )                                                 |                                                   |                                                        |
| 9  | Estrés no relacionado con la familia<br>( <i>Non-family-related stress</i> ) |                                                   |                                                        |
| 10 | Bajo nivel educacional<br>( <i>Low educational level</i> )                   |                                                   |                                                        |
| 11 | Estrés escolar<br>( <i>School stress</i> )                                   |                                                   |                                                        |
| 12 | Castigo de Dios<br>( <i>God's punishment</i> )                               |                                                   |                                                        |
| 13 | Mal del susto<br>( <i>Fright sickness</i> )                                  |                                                   |                                                        |
| 14 | Agarradura de teirra<br>( <i>Grab-from-land</i> )                            |                                                   |                                                        |
| 15 | Brujería<br>( <i>Witchcraft</i> )                                            |                                                   |                                                        |
| 16 | Magia negra<br>( <i>Black Magic</i> )                                        |                                                   |                                                        |

Items 1-11 were extracted from Questionnaire for Beliefs Regarding Schizophrenia in Bali (Kurihara et al., 2006) and Causal Models Questionnaire for Schizophrenia in China (Phillips et al., 2000). Items 12-16 were developed from key informant interviews (anthropologists, an intercultural Aymara consultant) as well as from the literature review.

Biological cause: Items 1, 4, 5 and 8; Psychosocial cause: Items 2, 3, 6, 7, 9, 10 and 11; Magical Religious: Items 12, 13, 14, 15 and 16 (God is meant by a Higher Self and Divine).

**Appendix 2. Drug Attitude Inventory, DAI-10** (*Inventario de Actitudes hacia la Medicación, DAI-10*)

Lea detenidamente cada una de las frases siguientes y decida si para usted son verdaderas o falsas. Las frases se refieren únicamente a la medicación psiquiátrica que toma actualmente. Si una frase es verdadera o en su mayor parte verdadera, rodee con un círculo la V. Si una frase es falsa o en su mayor parte falsa, rodee con un círculo la F. Si desea cambiar alguna respuesta, tache con una X la respuesta errónea y marque con un círculo la respuesta correcta.

*(Read carefully each of the following sentences and decide if for you they are true or false. The phrases refer only to psychiatric medication that you are currently taking. If a phrase is true or mostly true, wrap a circle T. If a phrase is untrue or largely false, wrap a circle F. If you want to change an answer, cross out the wrong answer with an X and mark with a circle the correct answer).*

|                                                                                                                                                                    |        |        |
|--------------------------------------------------------------------------------------------------------------------------------------------------------------------|--------|--------|
| 1. Para mí lo bueno de la medicación supera lo malo.<br><i>(For me, the good things about medication outweigh the bad).</i>                                        | V<br>T | F<br>F |
| 2. Me siento raro/a, como un zombi con la medicación.<br><i>(I feel strange, "doped up", on medication).</i>                                                       | V<br>T | F<br>F |
| 3. Tomo medicación por decisión mía.<br><i>(I take medications of my own free choice).</i>                                                                         | V<br>T | F<br>F |
| 4. La medicación hace que me sienta más relajado.<br><i>(Medications make me feel more relaxed).</i>                                                               | V<br>T | F<br>F |
| 5. La medicación hace que me sienta cansado/a y lento/a.<br><i>(Medication makes me feel tired and sluggish).</i>                                                  | V<br>T | F<br>F |
| 6. Tomo medicación sólo cuando estoy enfermo/a.<br><i>(I take medication only when I feel ill).</i>                                                                | V<br>T | F<br>F |
| 7. Me siento más normal con la medicación.<br><i>(I feel more normal on medication).</i>                                                                           | V<br>T | F<br>F |
| 8. Es antinatural para mi mente y mi cuerpo estar controlado/a por medicaciones.<br><i>(It is unnatural for my mind and body to be controlled by medications).</i> | V<br>T | F<br>F |
| 9. Mis pensamientos son más claros con medicación.<br><i>(My thoughts are clearer on medication).</i>                                                              | V<br>T | F<br>F |
| 10. Por estar con medicación puedo prevenir caer enfermo.<br><i>(Taking medication will prevent me from having a breakdown).</i>                                   | V<br>T | F<br>F |
